# Supplementary material
Source: PubMed Central journal article supplement (PMC5304450)
Supplement: NIHMS845188-supplement-Appendix_A__Survey.pdf [file NIHMS845188-supplement-Appendix_A__Survey.pdf]

## APPENDIX

### Appendix A: Finalized Public Bathroom Drug Use Survey

#### **Public Bathroom Drug Use Survey**

Date: \_\_\_\_\_

V10: January 26, 2015

The purpose of this survey is to gain a better understanding of drug use that occurs in public bathrooms. This information will be used to help guide the development of programs aimed at reducing drug use in public bathrooms.

**1a) Cross Street:** \_\_\_\_\_

**1b) Zipcode:** \_\_\_\_\_

**2) Most common shift worked? (Circle one)** a) Morning b) Afternoon c) Evening d) Late Night

**3) What type of establishment?**

a) Fast Food b) Coffee Shop c) Food Market d) Clothing Store e) Shopping Mall f) Restaurant g) Bodega h) Laundromat

**4a) Do you have a bathroom for customers?** Yes / No [If 'Yes' to 4a, continue. If 'No', you can end the survey]

**4b) Single-stall bathroom or Multiple-stall bathroom? (Circle one)** **4c) Does an employee have to unlock it?** Yes / No

**5) Have you encountered people using drugs in your business's bathroom in the past 6 months?** Yes / No

[If 'Yes', continue. If 'No', you can end the survey]

**6) On average, how many times do you encounter people using drugs in your bathroom per month?** \_\_\_\_\_

**7) Have customers complained about people using drugs in the bathroom?** Yes / No

**8) What is the most common drug paraphernalia you find in the bathroom? (Circle up to three)**

a) Syringes/Needles b) Baggies c) Cotton Balls d) Aluminium Foil e) Crack Pipe/Stem

f) Bottle Caps/Cookers g) Tourniquet h) Other:

\_\_\_\_\_

**9) Does the paraphernalia ever have blood on it?** Yes / No

**10a) Have you called 911 due to drug use in the bathroom in the past 6 months?** Yes / No

[If 'Yes', fill out Questions 10b and 10c]

**10b) If Yes, how many times in the past 6 months?** \_\_\_\_\_ **10c) Did you typically request:** a) Police b) EMS c) Both

**11a) Have you ever called 911 because someone was unresponsive in the bathroom?** Yes / No

[If 'Yes', continue, if 'No' skip to Question 12]

**11b) Do you believe it was drug related?** Yes / No

[If 'Yes', continue, if 'No' skip to Question 12]

**11c) Number of times 911 called due to unresponsive drug-related incidences in the last 6 months?** \_\_\_\_\_

**11d) Did you notify your superior/corporate office to report these events?** Yes / No

If Yes, what was their response?

---

**11e) Has anyone died in your bathroom in the past 6 months as a result of drug use?** Yes / No

**12) Are you and your staff trained in how to recognize a drug overdose and how to reverse opioid overdoses with naloxone (Narcan)?** Yes / No      **Would this training be useful?** Yes / No
